# Supplementary material
Source: publisher site journal article supplement (https://www.dovepress.com/article/422191)
Supplement: Supplementary file 1 [file get_supplementary_file.php]

Table S1. The presence and copies of chvD homologous in Mycobacterium species with whole genome sequence

| Species                                                                   | Genebank ID     | presence of chvD homologous | No. of copies | Reference strain No. |
|---------------------------------------------------------------------------|-----------------|-----------------------------|---------------|----------------------|
| Mycobacteroides chelonae (Bergey et al. 1923) Gupta et al. 2018           | GCA_001632805.1 | Yes                         | single        | CCUG 47445           |
| Mycobacterium acidiphilus Xia et al. 2022                                 | GCA_018455725.1 | Yes                         | single        | M1                   |
| Mycobacterium algericus (Sahraoui et al. 2011) Gupta et al. 2018          | GCA_002086455.1 | Yes                         | single        | DSM 45454            |
| Mycobacterium arupensis (Cloud et al. 2006) Gupta et al. 2018             | GCA_002086515.1 | Yes                         | single        | DSM 44942            |
| Mycobacterium engbaekii (Tortoli et al. 2013) Gupta et al. 2018           | GCA_002101585.1 | Yes                         | single        | ATCC 27353           |
| Mycobacterium heraklionensis (Tortoli et al. 2013) Gupta et al. 2018      | GCA_019645815.1 | Yes                         | single        | JCM 30995            |
| Mycobacterium hiberniae (Kazda et al. 1993) Gupta et al. 2018             | GCA_010729485.1 | Yes                         | single        | JCM 13571            |
| Mycobacterium icosiummassiliensis Gupta et al. 2018                       | GCA_900078685.2 | Yes                         | single        | 8WA6                 |
| Mycobacterium longobardus (Tortoli et al. 2013) Gupta et al. 2018         | GCA_002102265.1 | Yes                         | single        | DSM 45394            |
| Mycobacterium minnesotensis (Hannigan et al. 2013) Gupta et al. 2018      | GCA_010731755.1 | Yes                         | single        | JCM 17932            |
| Mycobacterium nonchromogenicus (Tsukamura 1965) Gupta et al. 2018         | GCA_002101775.1 | Yes                         | single        | DSM 44164            |
| Mycobacterium sensuensis (Mun et al. 2008) Gupta et al. 2018              | GCA_010723225.1 | Yes                         | single        | JCM 16017            |
| Mycobacterium sinensis Gupta et al. 2018                                  | GCA_000214155.1 | Yes                         | single        | JDM601               |
| Mycobacterium terrae (Wayne 1966) Gupta et al. 2018                       | GCA_900187145.1 | Yes                         | single        | NCTC10856            |
| Mycobacterium obuense (Tsukamura and Mizuno 1981) Gupta et al. 2018       | GCA_004359005.1 | Yes                         | single        | 22DIII               |
| Mycobacterium parafortuitum (Tsukamura 1966) Gupta et al. 2018            | GCA_010725485.1 | Yes                         | single        | JCM 6367             |
| Mycobacterium phlei (Lehmann and Neumann 1899) Gupta et al. 2018          | GCA_900453675.1 | Yes                         | single        | NCTC8156             |
| Mycobacterium poriferae (Padgett and Moshier 1987) Gupta et al. 2018      | GCA_025822745.1 | Yes                         | single        | DSM 44585            |
| Mycobacterium psychrotolerans (Trujillo et al. 2004) Gupta et al. 2018    | GCA_010728325.1 | Yes                         | single        | JCM 12603            |
| Mycobacterium pyrenivorans (Derz et al. 2004) Gupta et al. 2018           | GCA_025821625.1 | Yes                         | single        | DSM 44605            |
| Mycobacterium rufum (Hennessee et al. 2009) Gupta et al. 2018             | GCA_022374875.3 | Yes                         | single        | JCM 16372            |
| Mycobacterium smegmatis (Trevisan 1889) Gupta et al. 2018                 | GCA_013349145.1 | Yes                         | single        | FDAARGOS_679         |
| Mycobacterium tusciae (Tortoli et al. 1999) Gupta et al. 2018             | GCA_002086795.1 | Yes                         | single        | DSM 44338            |
| Mycobacterium vanbaalenii (Khan et al. 2002) Gupta et al. 2018            | GCA_000015305.1 | Yes                         | single        | PYR-1                |
| Mycobacterium xanthum Pan et al. 2022                                     | GCA_019710635.1 | Yes                         | single        | Y57                  |
| Mycobacterium terrae Wayne 1966 (Approved Lists 1980)                     | GCA_900187145.1 | Yes                         | single        | NCTC10856            |
| Mycobacterium thermoresistibile Tsukamura 1966 (Approved Lists 1980)      | GCA_900187065.1 | Yes                         | single        | NCTC10409            |
| Mycobacterium timonense Ben Salah et al. 2009                             | GCA_010723675.1 | Yes                         | single        | JCM 30726            |
| Mycobacterium tuberculosis (Zopf 1883) Lehmann and Neumann 1896           | GCA_000195955.2 | Yes                         | single        | H37Rv                |
| Mycobacterium tusciae Tortoli et al. 1999                                 | GCA_002086795.1 | Yes                         | single        | DSM 44338            |
| Mycobacterium uberis Benjak et al. 2018                                   | GCA_003408705.1 | Yes                         | single        | Jura                 |
| Mycobacterium vanbaalenii Khan et al. 2002                                | GCA_000015305.1 | Yes                         | single        | PYR-1                |
| Mycobacterium yongonense Kim et al. 2013                                  | GCA_001686645.1 | Yes                         | single        | E3170                |
| Mycobacterium acapulcense Gupta et al. 2018                               | GCA_001499915.1 | Yes                         | single        | GA-1331              |
| Mycobacterium agri (Tsukamura 1981) Gupta et al. 2018                     | GCA_010722915.1 | Yes                         | single        | JCM 6377             |
| Mycobacterium aichiense (Tsukamura 1981) Gupta et al. 2018                | GCA_010726245.1 | Yes                         | single        | JCM 6376             |
| Mycobacterium alvei (Ausina et al. 1992) Gupta et al. 2018                | GCA_010727325.1 | Yes                         | single        | JCM 12272            |
| Mycobacterium anagense (Kim et al. 2015) Gupta et al. 2018                | GCA_010731855.1 | Yes                         | single        | JCM 30275            |
| Mycobacterium aurantiacum Pan et al. 2022                                 | GCA_019710595.1 | Yes                         | single        | 3033                 |
| Mycobacterium aurum (Tsukamura 1966) Gupta et al. 2018                    | GCA_900637195.1 | Yes                         | single        | NCTC10437            |
| Mycobacterium bacteremicum (Brown-Elliott et al. 2012) Gupta et al. 2018  | GCA_002086115.1 | Yes                         | single        | DSM 45578            |
| Mycobacterium boenickei (Schinsky et al. 2004) Gupta et al. 2018          | GCA_010731295.1 | Yes                         | single        | JCM 15653            |
| Mycobacterium brumae (Luquin et al. 1993) Gupta et al. 2018               | GCA_025215495.1 | Yes                         | single        | ATCC 51384           |
| Mycobacterium canariensis (Jiménez et al. 2004) Gupta et al. 2018         | GCA_002101555.1 | Yes                         | single        | CCUG 47953           |
| Mycobacterium chlorophenolicum (Apajalahti et al. 1986) Gupta et al. 2018 | GCA_001552315.1 | Yes                         | single        | NBRC 15527           |
| Mycobacterium chubuense (Tsukamura 1981) Gupta et al. 2018                | GCA_900453455.1 | Yes                         | single        | NCTC10819            |
| Mycobacterium cosmeticum (Cooksey et al. 2004) Gupta et al. 2018          | GCA_000613185.1 | Yes                         | single        | DSM 44829            |
| Mycobacterium diernhoferi (Tsukamura et al. 1983) Gupta et al. 2018       | GCA_019456655.1 | Yes                         | single        | ATCC 19340           |
| Mycobacterium fallax (Lévy-Frèbault et al. 1983) Gupta et al. 2018        | GCA_010726955.1 | Yes                         | single        | JCM 6405             |
| Mycobacterium flavescens (Bojalil et al. 1962) Gupta et al. 2018          | GCA_001722335.1 | Yes                         | single        | M6                   |
| Mycobacterium gadium (Casal and Calero 1974) Gupta et al. 2018            | GCA_010728295.1 | Yes                         | single        | JCM 12688            |
| Mycobacterium gilvum (Stanford and Gunthorpe 1971) Gupta et al. 2018      | GCA_000184435.1 | Yes                         | single        | Spyr1                |
| Mycobacterium goodii (Brown et al. 1999) Gupta et al. 2018                | GCA_022370755.2 | Yes                         | single        | ATCC 700504          |
| Mycobacterium helvum (Tran and Dahl 2016) Gupta et al. 2018               | GCA_010731895.1 | Yes                         | single        | JCM 30396            |
| Mycobacterium insubricum (Tortoli et al. 2009) Gupta et al. 2018          | GCA_010731615.1 | Yes                         | single        | JCM 16366            |
| Mycobacterium komanii (Geebe et al. 2018) Gupta et al. 2018               | GCA_001050035.1 | Yes                         | single        | GPk 1020             |
| Mycobacterium litorale (Zhang et al. 2012) Gupta et al. 2018              | GCA_010731695.1 | Yes                         | single        | JCM 17423            |
| Mycobacterium lutetiense (Koniak et al. 2016) Gupta et al. 2018           | GCA_017876775.1 | Yes                         | single        | DSM 46713            |
| Mycobacterium mageritense (Domenech et al. 1997) Gupta et al. 2018        | GCA_010727475.1 | Yes                         | single        | JCM 12375            |
| Mycobacterium vinylchloridicum Cortes-Albayay et al. 2021                 | GCA_013404075.1 | Yes                         | single        | CECT 8761            |
| Mycobacterium acapulcensis Bojalil et al. 1962                            | GCA_001499915.1 | Yes                         | single        | GA-1331              |
| Mycobacterium africanum Castets et al. 1969 (Approved Lists 1980)         | GCA_002982335.1 | Yes                         | single        | ATCC 25420           |
| Mycobacterium agri (ex Tsukamura 1972) Tsukamura 1981                     | GCA_010722915.1 | Yes                         | single        | JCM 6377             |
| Mycobacterium aichiense (ex Tsukamura 1973) Tsukamura 1981                | GCA_010726245.1 | Yes                         | single        | JCM 6376             |
| Mycobacterium algericum Sahraoui et al. 2011                              | GCA_010723515.1 | Yes                         | single        | JCM 30723            |
| Mycobacterium alvei Ausina et al. 1992                                    | GCA_010727325.1 | Yes                         | single        | JCM 12272            |
| Mycobacterium anyangense Kim et al. 2015                                  | GCA_010731855.1 | Yes                         | single        | JCM 30275            |
| Mycobacterium arupense Cloud et al. 2006                                  | GCA_002086515.1 | Yes                         | single        | DSM 44942            |
| Mycobacterium attenuatum Tagini et al. 2019                               | GCA_900566065.1 | Yes                         | single        | MK136                |
| Mycobacterium aurum Tsukamura 1966 (Approved Lists 1980)                  | GCA_900637195.1 | Yes                         | single        | NCTC10437            |
| Mycobacterium avium Chester 1901 (Approved Lists 1980)                    | GCA_002175585.1 | Yes                         | single        | OCU889s_P11_4s       |
| Mycobacterium bacteremicum Brown-Elliott et al. 2012                      | GCA_002086115.1 | Yes                         | single        | DSM 45578            |
| Mycobacterium basiliense Seth-Smith et al. 2019                           | GCA_900292015.1 | Yes                         | single        | 0:00:00              |
| Mycobacterium boenickei Schinsky et al. 2004                              | GCA_010731295.1 | Yes                         | single        | JCM 15653            |
| Mycobacterium bohemicum Reischl et al. 1998                               | GCA_002102025.1 | Yes                         | single        | DSM 44277            |
| Mycobacterium bovis Karlson and Lessel 1970 (Approved Lists 1980)         | GCA_000729745.1 | Yes                         | single        | 09-1191              |
| Mycobacterium brumae Luquin et al. 1993                                   | GCA_025215495.1 | Yes                         | single        | ATCC 51384           |
| Mycobacterium canariensis Jiménez et al. 2004                             | GCA_002101555.1 | Yes                         | single        | CCUG 47953           |
| Mycobacterium canetti van Soolingen et al. 1997                           | GCA_000253375.1 | Yes                         | single        | CIFT 140010059       |
| Mycobacterium chelonae corrig. Bergey et al. 1923 (Approved Lists 1980)   | GCA_001632805.1 | Yes                         | single        | CCUG 47445           |
| Mycobacterium chelonae Bergey et al. 1923 (Approved Lists 1980)           | GCA_001632805.1 | Yes                         | single        | CCUG 47445           |
| Mycobacterium chimera Tortoli et al. 2004                                 | GCA_001307335.1 | Yes                         | single        | MCIMRL2              |
| Mycobacterium chlorophenolicum (Apajalahti et al. 1986) Häggblom et al.   | GCA_001552315.1 | Yes                         | single        | NBRC 15527           |
| Mycobacterium chubuense (ex Tsukamura 1973) Tsukamura 1981                | GCA_900453455.1 | Yes                         | single        | NCTC10819            |
| Mycobacterium cookii Kazda et al. 1990                                    | GCA_010727945.1 | Yes                         | single        | JCM 12404            |
| Mycobacterium cosmeticum Cooksey et al. 2004                              | GCA_000613185.1 | Yes                         | single        | DSM 44829            |
| Mycobacterium crocinum Hennessee et al. 2009                              | GCA_025822435.1 | Yes                         | single        | DSM 45433            |
| Mycobacterium decipiens Brown-Elliott et al. 2018                         | GCA_002104675.1 | Yes                         | single        | TBL 1200985          |
| Mycobacterium diernhoferi (ex Bönicke and Juhasz 1965) Tsukamura et al.   | GCA_019456655.1 | Yes                         | single        | ATCC 19340           |
| Mycobacterium eburneum Nouioui et al. 2017                                | GCA_004354905.1 | Yes                         | single        | DSM 44358            |
| Mycobacterium engbaekii Tortoli et al. 2013                               | GCA_002101585.1 | Yes                         | single        | ATCC 27353           |
| Mycobacterium fallax Lévy-Frèbault et al. 1983                            | GCA_010726955.1 | Yes                         | single        | JCM 6405             |
| Mycobacterium flavescens Bojalil et al. 1962 (Approved Lists 1980)        | GCA_001722335.1 | Yes                         | single        | M6                   |
| Mycobacterium mungi Alexander et al. 2010                                 | LXTB00000000.1  | Yes                         | single        | BM22813              |
| Mycobacterium nonchromogenicum Tsukamura 1965 (Approved Lists 1980)       | GCA_002101775.1 | Yes                         | single        | DSM 44164            |
| Mycobacterium noviomagense van Ingen et al. 2009                          | GCA_010731635.1 | Yes                         | single        | JCM 16367            |
| Mycobacterium obuense (ex Tsukamura and Mizuno 1971) Tsukamura and        | GCA_004359005.1 | Yes                         | single        | 22DIII               |
| Mycobacterium oryzae van Ingen et al. 2012                                | GCA_006385035.1 | Yes                         | single        | NIRTAH144            |
| Mycobacterium paraffinicum (ex Davis et al. 1956) Toney et al. 2010       | GCA_025822865.1 | Yes                         | single        | DSM 44181            |
| Mycobacterium parafortuitum Tsukamura 1966 (Approved Lists 1980)          | GCA_010725485.1 | Yes                         | single        | JCM 6367             |
| Mycobacterium phlei Lehmann and Neumann 1899 (Approved Lists 1980)        | GCA_900453675.1 | Yes                         | single        | NCTC8156             |
| Mycobacterium pinnipedii Cousins et al. 2003                              | GCA_002982275.1 | Yes                         | single        | ATCC BAA-688         |
| Mycobacterium poriferae Padgett and Moshier 1987                          | GCA_010728325.1 | Yes                         | single        | JCM 12603            |
| Mycobacterium psychrotolerans Trujillo et al. 2004                        | GCA_010729305.1 | Yes                         | single        | JCM 13323            |

|                                                                                 |                 |     |        |               |
|---------------------------------------------------------------------------------|-----------------|-----|--------|---------------|
| <i>Mycobacterium pyrenivorans</i> Derz <i>et al.</i> 2004                       | GCA_025821625.1 | Yes | single | DSM 44605     |
| <i>Mycobacterium rhizamassiliense</i> Bouam <i>et al.</i> 2018                  | GCA_900157375.1 | Yes | single | AB57          |
| <i>Mycobacterium rufum</i> Hennessee <i>et al.</i> 2009                         | GCA_022374875.3 | Yes | single | JCM 16372     |
| <i>Mycobacterium senuense</i> Mun <i>et al.</i> 2008                            | GCA_010723225.1 | Yes | single | JCM 16017     |
| <i>Mycobacterium shimoidae</i> (ex Tsukamura <i>et al.</i> 1975) Tsukamura 1982 | GCA_025822885.1 | Yes | single | DSM 44152     |
| <i>Mycobacterium shinjukuense</i> Saito <i>et al.</i> 2011                      | GCA_010730055.1 | Yes | single | JCM 14233     |
| <i>Mycobacterium simulans</i> Tortoli <i>et al.</i> 2010                        | GCA_900232995.1 | Yes | single | FI-09026      |
| <i>Mycobacterium sinense</i> Zhang <i>et al.</i> 2013                           | GCA_000214155.1 | Yes | single | JDM601        |
| <i>Mycobacterium smegmatis</i> (Trevisan 1889) Lehmann and Neumann 1899         | GCA_013349145.1 | Yes | single | FDAARGOS_679  |
| <i>Mycobacterium gadium</i> Casal and Calero 1974 (Approved Lists 1980)         | GCA_010728925.1 | Yes | single | JCM 12688     |
| <i>Mycobacterium gallinarum</i> Tsukamura <i>et al.</i> 1967                    | GCA_010726765.1 | Yes | single | JCM 6399      |
| <i>Mycobacterium genavense</i> Böttger <i>et al.</i> 1993                       | GCA_000526915.1 | Yes | single | ATCC 51234    |
| <i>Mycobacterium gilvum</i> Stanford and Gunthorpe 1971 (Approved Lists 1980)   | GCA_000184435.1 | Yes | single | Spyr1         |
| <i>Mycobacterium globetum</i> Gray 1928                                         | GCA_008125105.1 | Yes | single | DSM 44596     |
| <i>Mycobacterium goodii</i> Brown <i>et al.</i> 1999                            | GCA_022370755.2 | Yes | single | ATCC 700504   |
| <i>Mycobacterium gordonae</i> Bojalil <i>et al.</i> 1962 (Approved Lists 1980)  | GCA_002101675.1 | Yes | single | DSM 44160     |
| <i>Mycobacterium hackensackense</i> Hong <i>et al.</i> 2003                     | GCA_025822555.1 | Yes | single | DSM 44833     |
| <i>Mycobacterium heidelbergense</i> Haas <i>et al.</i> 1998                     | GCA_010730745.1 | Yes | single | JCM 14842     |
| <i>Mycobacterium helvum</i> Tran and Dahl 2016                                  | GCA_010731895.1 | Yes | single | JCM 30396     |
| <i>Mycobacterium heraklionense</i> Tortoli <i>et al.</i> 2013                   | GCA_019645815.1 | Yes | single | JCM 30995     |
| <i>Mycobacterium hiberniae</i> Kazda <i>et al.</i> 1993                         | GCA_010729485.1 | Yes | single | JCM 13571     |
| <i>Mycobacterium icosium</i> massiliensis Djouadi <i>et al.</i> 2016            | GCA_900078685.2 | Yes | single | 8WA6          |
| <i>Mycobacterium insubricum</i> Tortoli <i>et al.</i> 2009                      | GCA_010731615.1 | Yes | single | JCM 16366     |
| <i>Mycobacterium intermedium</i> Meier <i>et al.</i> 1993                       | GCA_001722345.1 | Yes | single | HMC2_M5       |
| <i>Mycobacterium intracellulare</i> (Cuttino and McCabe 1949) Runyon 1965       | GCA_020736005.1 | Yes | single | FDAARGOS_1564 |
| <i>Mycobacterium komaniense</i> Gcebe <i>et al.</i> 2018                        | GCA_001050035.1 | Yes | single | GPk 1020      |
| <i>Mycobacterium komanii</i> Gcebe <i>et al.</i> 2016                           | GCA_001050035.1 | Yes | single | GPk 1020      |
| <i>Mycobacterium kyogaense</i> Nouiouei <i>et al.</i> 2018                      | GCA_003254575.1 | Yes | single | NCTC 11659    |
| <i>Mycobacterium kyorinense</i> Okazaki <i>et al.</i> 2009                      | GCA_001439515.1 | Yes | single | HF1629        |
| <i>Mycobacterium lacus</i> Turenne <i>et al.</i> 2002                           | GCA_010731535.1 | Yes | single | JCM 15657     |
| <i>Mycobacterium lentiflavum</i> Springer <i>et al.</i> 1996                    | GCA_001373395.1 | Yes | single | CSUR P1491    |
| <i>Mycobacterium lepromatosis</i> Han <i>et al.</i> 2008                        | GCA_000975265.2 | Yes | single | FJ924         |
| <i>Mycobacterium litorale</i> Zhang <i>et al.</i> 2012                          | GCA_010731695.1 | Yes | single | JCM 17423     |
| <i>Mycobacterium longobardum</i> Tortoli <i>et al.</i> 2013                     | GCA_002102265.1 | Yes | single | DSM 45394     |
| <i>Mycobacterium lutetiense</i> Konjek <i>et al.</i> 2016                       | GCA_017876775.1 | Yes | single | DSM 46713     |
| <i>Mycobacterium mageritense</i> Domenech <i>et al.</i> 1997                    | GCA_010727475.1 | Yes | single | JCM 12375     |
| <i>Mycobacterium malmoense</i> Schröder and Juhlin 1977 (Approved Lists 1980)   | GCA_019645855.1 | Yes | single | ATCC 29571    |
| <i>Mycobacterium marseillense</i> Ben Salah <i>et al.</i> 2009                  | GCA_002285715.1 | Yes | single | FLAC0026      |
| <i>Mycobacterium microti</i> Reed 1957 (Approved Lists 1980)                    | GCA_002982215.1 | Yes | single | ATCC 19422    |
| <i>Mycobacterium minnesotense</i> Hannigan <i>et al.</i> 2013                   | GCA_010731755.1 | Yes | single | JCM 17932     |

Note: The mycobacterium species were retrieved from LPSN

Table S2: Sequence pair distances of 60 type/reference strains of *Mycobacterium* and 1 out-group strain determined by using the multiple alignment in the Nussli package/version 10.1.0; DNA STR, Indian, 1
